# Supplementary material for: The influence of genetics on the endocannabinoid system gene expression and relevance for targeting reproductive conditions
Source: J Cannabis Res. 2025 May 29;7:29. doi: 10.1186/s42238-025-00275-x (PMC12124005; doi:10.1186/s42238-025-00275-x)
Supplement: Supplementary file 1 — Supplementary Material 1. [file 42238_2025_275_MOESM1_ESM.xlsx]

## Sheet: Sheet1
ECS genes
ABHD12
ABHD4
ABHD6
ALOX12
ALOX15
ALOX5
CNR1
CNR2
COX-2
CYP2DP
CYP3A4
CYP4F2
DAGLA
DAGLB
FAAH
FABP1
FABP2
FABP3
FABP4
FABP5
FABP6
FABP7
GDE-1
GDE4
GDE7
GPR55
MAGL
NAAA
NAPE-PLD
NAT1
NAT2
PLA2G10
PLA2G12A
PLA2G12B
PLA2G1B
PLA2G2A
PLA2G2C
PLA2G2E
PLA2G2F
PLA2G3
PLA2G4A
PLA2G4B
PLA2G4C
PLA2G4D
PLA2G4E
PLA2G4F
PLA2G5
PLA2G6
PLA2G7
PLAG2D
PLCB1
PLCB2
PLCB3
PLCB4
PLCD1
PLCD3
PLCD4
PLCE1
PLCG1
PLCG2
PLCH1
PLCH2
PLCL1
PLCL2
PLCZ1
PLD1
PLD2
PTPN22
TRPA1
TRPV1
