# Supplementary material for: The influence of genetics on the endocannabinoid system gene expression and relevance for targeting reproductive conditions
Source: J Cannabis Res. 2025 May 29;7:29. doi: 10.1186/s42238-025-00275-x (PMC12124005; doi:10.1186/s42238-025-00275-x)
Supplement: Supplementary file 2 — Supplementary Material 2. [file 42238_2025_275_MOESM2_ESM.xlsx]

## Sheet: A list of genes in each tissue
Gene	Gene stable ID	Adipose_Subcutaneous	Adipose_Visceral_Omentum	Adrenal_Gland	Artery_Aorta	Artery_Coronary	Artery_Tibial	Brain_Amygdala	Brain_Anterior_cingulate_cortex_BA24	Brain_Caudate_basal_ganglia	Brain_Cerebellar_Hemisphere	Brain_Cerebellum	Brain_Cortex	Brain_Frontal_Cortex_BA9	Brain_Hippocampus	Brain_Hypothalamus	Brain_Nucleus_accumbens_basal_ganglia	Brain_Putamen_basal_ganglia	Brain_Spinal_cord_cervical_c-1	Brain_Substantia_nigra	Breast_Mammary_Tissue	Cells_Cultured_fibroblasts	Cells_EBV-transformed_lymphocytes	Colon_Sigmoid	Colon_Transverse	Esophagus_Gastroesophageal_Junction	Esophagus_Mucosa	Esophagus_Muscularis	Heart_Atrial_Appendage	Heart_Left_Ventricle	Kidney_Cortex	Liver	Lung	Minor_Salivary_Gland	Muscle_Skeletal	Nerve_Tibial	Ovary	Pancreas	Pituitary	Prostate	Skin_Not_Sun_Exposed_Suprapubic	Skin_Sun_Exposed_Lower_leg	Small_Intestine_Terminal_Ileum	Spleen	Stomach	Testis	Thyroid	Uterus	Vagina
ABHD12	ENSG00000100997	ABHD12	ABHD12		ABHD12	ABHD12	ABHD12	ABHD12	ABHD12	ABHD12	ABHD12	ABHD12	ABHD12	ABHD12	ABHD12	ABHD12	ABHD12	ABHD12		ABHD12	ABHD12	ABHD12		ABHD12	ABHD12	ABHD12	ABHD12	ABHD12	ABHD12	ABHD12		ABHD12	ABHD12	ABHD12	ABHD12	ABHD12	ABHD12	ABHD12	ABHD12	ABHD12	ABHD12	ABHD12	ABHD12	ABHD12	ABHD12	ABHD12		ABHD12
ABHD4	ENSG00000100439		ABHD4	ABHD4	ABHD4		ABHD4										ABHD4					ABHD4	ABHD4	ABHD4	ABHD4	ABHD4	ABHD4	ABHD4	ABHD4	ABHD4		ABHD4	ABHD4	ABHD4	ABHD4	ABHD4		ABHD4	ABHD4	ABHD4	ABHD4	ABHD4			ABHD4		ABHD4
ABHD6	ENSG00000163686	ABHD6	ABHD6		ABHD6		ABHD6		ABHD6		ABHD6	ABHD6	ABHD6	ABHD6			ABHD6	ABHD6				ABHD6	ABHD6	ABHD6		ABHD6	ABHD6	ABHD6	ABHD6			ABHD6			ABHD6	ABHD6		ABHD6			ABHD6	ABHD6	ABHD6	ABHD6		ABHD6	ABHD6
ALOX12	ENSG00000108839	ALOX12	ALOX12	ALOX12	ALOX12		ALOX12							ALOX12		ALOX12					ALOX12		ALOX12	ALOX12	ALOX12	ALOX12	ALOX12	ALOX12							ALOX12	ALOX12	ALOX12	ALOX12		ALOX12						ALOX12	ALOX12
ALOX15	ENSG00000161905				ALOX15		ALOX15	ALOX15	ALOX15	ALOX15	ALOX15	ALOX15	ALOX15	ALOX15	ALOX15	ALOX15	ALOX15							ALOX15	ALOX15	ALOX15	ALOX15	ALOX15	ALOX15	ALOX15												ALOX15	ALOX15			ALOX15		ALOX15
ALOX5	ENSG00000012779	ALOX5	ALOX5	ALOX5	ALOX5	ALOX5	ALOX5		ALOX5		ALOX5	ALOX5	ALOX5	ALOX5							ALOX5			ALOX5	ALOX5	ALOX5	ALOX5	ALOX5	ALOX5	ALOX5		ALOX5	ALOX5		ALOX5	ALOX5		ALOX5		ALOX5	ALOX5	ALOX5	ALOX5	ALOX5			ALOX5
CNR1	ENSG00000118432	CNR1					CNR1				CNR1	CNR1					CNR1					CNR1		CNR1			CNR1	CNR1		CNR1			CNR1			CNR1						CNR1		CNR1	CNR1		CNR1
CNR2	ENSG00000188822																								CNR2								CNR2										CNR2	CNR2		CNR2	CNR2
COX-2	ENSG00000073756																																COX-2			COX-2						COX-2	COX-2			COX-2	COX-2
CYP2D6	ENSG00000100197	CYP2D6	CYP2D6	CYP2D6	CYP2D6	CYP2D6	CYP2D6	CYP2D6	CYP2D6	CYP2D6	CYP2D6	CYP2D6	CYP2D6	CYP2D6	CYP2D6	CYP2D6	CYP2D6	CYP2D6	CYP2D6	CYP2D6	CYP2D6	CYP2D6	CYP2D6	CYP2D6	CYP2D6	CYP2D6	CYP2D6	CYP2D6	CYP2D6	CYP2D6	CYP2D6	CYP2D6	CYP2D6	CYP2D6	CYP2D6	CYP2D6	CYP2D6	CYP2D6	CYP2D6	CYP2D6	CYP2D6	CYP2D6	CYP2D6	CYP2D6	CYP2D6	CYP2D6	CYP2D6	CYP2D6	CYP2D6
CYP3A4	ENSG00000160868		CYP3A4								CYP3A4	CYP3A4									CYP3A4						CYP3A4								CYP3A4						CYP3A4	CYP3A4	CYP3A4
CYP4F2	ENSG00000186115										CYP4F2	CYP4F2	CYP4F2	CYP4F2							CYP4F2				CYP4F2		CYP4F2											CYP4F2		CYP4F2	CYP4F2	CYP4F2	CYP4F2		CYP4F2				CYP4F2
DAGL	ENSG00000134780	DAGL				DAGL					DAGL	DAGL									DAGL	DAGL		DAGL			DAGL		DAGL							DAGL		DAGL				DAGL		DAGL		DAGL	DAGL
FAAH	ENSG00000117480	FAAH	FAAH	FAAH	FAAH	FAAH	FAAH			FAAH	FAAH	FAAH	FAAH	FAAH		FAAH	FAAH	FAAH	FAAH	FAAH	FAAH	FAAH	FAAH	FAAH	FAAH	FAAH	FAAH	FAAH	FAAH	FAAH			FAAH		FAAH	FAAH		FAAH	FAAH	FAAH	FAAH	FAAH	FAAH	FAAH		FAAH	FAAH
FABP1	ENSG00000163586	FABP1					FABP1	FABP1	FABP1	FABP1	FABP1	FABP1	FABP1	FABP1	FABP1	FABP1	FABP1	FABP1	FABP1	FABP1						FABP1		FABP1	FABP1						FABP1	FABP1			FABP1							FABP1	FABP1
FABP2	ENSG00000145384			FABP2																				FABP2	FABP2				FABP2	FABP2	FABP2				FABP2								FABP2	FABP2		FABP2
FABP3	ENSG00000121769	FABP3		FABP3	FABP3		FABP3			FABP3	FABP3	FABP3		FABP3			FABP3	FABP3			FABP3	FABP3													FABP3	FABP3			FABP3		FABP3	FABP3					FABP3
FABP4	ENSG00000170323						FABP4																						FABP4	FABP4			FABP4		FABP4									FABP4			FABP4
FABP5	ENSG00000164687	FABP5									FABP5														FABP5															FABP5		FABP5
FABP6	ENSG00000170231			FABP6																							FABP6			FABP6			FABP6	FABP6		FABP6					FABP6	FABP6				FABP6
FABP7	ENSG00000164434									FABP7																			FABP7						FABP7					FABP7		FABP7				FABP7
GDE-1	ENSG00000006007			GDE-1	GDE-1		GDE-1				GDE-1	GDE-1				GDE-1								GDE-1		GDE-1	GDE-1	GDE-1	GDE-1				GDE-1		GDE-1	GDE-1					GDE-1	GDE-1		GDE-1		GDE-1	GDE-1
GDE4	ENSG00000153982	GDE4	GDE4		GDE4				GDE4	GDE4		GDE4										GDE4	GDE4		GDE4								GDE4			GDE4		GDE4				GDE4		GDE4			GDE4
GDE7	ENSG00000102886	GDE7	GDE7	GDE7	GDE7	GDE7	GDE7			GDE7	GDE7	GDE7	GDE7	GDE7		GDE7		GDE7	GDE7		GDE7	GDE7		GDE7	GDE7	GDE7	GDE7	GDE7	GDE7	GDE7		GDE7	GDE7		GDE7	GDE7		GDE7	GDE7	GDE7	GDE7	GDE7	GDE7	GDE7	GDE7	GDE7	GDE7
GPR119	ENSG00000147262																																													GPR119
GPR55	ENSG00000135898								GPR55	GPR55			GPR55	GPR55			GPR55	GPR55			GPR55				GPR55	GPR55	GPR55	GPR55						GPR55						GPR55				GPR55	GPR55	GPR55	GPR55
MAGL	ENSG00000074416				MAGL		MAGL				MAGL	MAGL						MAGL				MAGL	MAGL		MAGL		MAGL						MAGL		MAGL	MAGL								MAGL			MAGL
NAAA	ENSG00000138744	NAAA	NAAA	NAAA	NAAA	NAAA	NAAA	NAAA	NAAA	NAAA	NAAA	NAAA	NAAA	NAAA	NAAA	NAAA	NAAA	NAAA	NAAA	NAAA	NAAA	NAAA	NAAA	NAAA	NAAA	NAAA	NAAA	NAAA	NAAA	NAAA	NAAA	NAAA	NAAA	NAAA	NAAA	NAAA	NAAA	NAAA	NAAA		NAAA	NAAA	NAAA	NAAA	NAAA	NAAA	NAAA	NAAA	NAAA
NAPE-PLD	ENSG00000161048	NAPE-PLD	NAPE-PLD		NAPE-PLD		NAPE-PLD			NAPE-PLD		NAPE-PLD					NAPE-PLD	NAPE-PLD			NAPE-PLD	NAPE-PLD		NAPE-PLD	NAPE-PLD	NAPE-PLD	NAPE-PLD	NAPE-PLD	NAPE-PLD	NAPE-PLD			NAPE-PLD		NAPE-PLD	NAPE-PLD		NAPE-PLD	NAPE-PLD	NAPE-PLD	NAPE-PLD	NAPE-PLD	NAPE-PLD	NAPE-PLD	NAPE-PLD	NAPE-PLD	NAPE-PLD		NAPE-PLD
NAT1	ENSG00000171428										NAT1	NAT1			NAT1									NAT1	NAT1		NAT1														NAT1		NAT1				NAT1		NAT1
NAT2	ENSG00000156006										NAT2				NAT2		NAT2													NAT2			NAT2						NAT2							NAT2		NAT2
PLA2G10	ENSG00000069764																								PLA2G10		PLA2G10						PLA2G10					PLA2G10		PLA2G10					PLA2G10	PLA2G10
PLA2G12A	ENSG00000123739	PLA2G12A	PLA2G12A		PLA2G12A	PLA2G12A	PLA2G12A	PLA2G12A	PLA2G12A	PLA2G12A			PLA2G12A	PLA2G12A	PLA2G12A		PLA2G12A	PLA2G12A	PLA2G12A	PLA2G12A	PLA2G12A	PLA2G12A		PLA2G12A	PLA2G12A	PLA2G12A	PLA2G12A	PLA2G12A				PLA2G12A	PLA2G12A	PLA2G12A	PLA2G12A	PLA2G12A			PLA2G12A		PLA2G12A	PLA2G12A	PLA2G12A	PLA2G12A		PLA2G12A	PLA2G12A		PLA2G12A
PLA2G12B	ENSG00000138308																								PLA2G12B								PLA2G12B
PLA2G1B	ENSG00000170890																																PLA2G1B			PLA2G1B					PLA2G1B				PLA2G1B
PLA2G2A	ENSG00000188257	PLA2G2A	PLA2G2A																							PLA2G2A		PLA2G2A	PLA2G2A			PLA2G2A				PLA2G2A				PLA2G2A	PLA2G2A	PLA2G2A				PLA2G2A	PLA2G2A
PLA2G2C	ENSG00000187980																				PLA2G2C			PLA2G2C	PLA2G2C	PLA2G2C	PLA2G2C	PLA2G2C																		PLA2G2C
PLA2G2E	ENSG00000188784
PLA2G2F	ENSG00000158786																																							PLA2G2F	PLA2G2F	PLA2G2F				PLA2G2F
PLA2G3	ENSG00000100078										PLA2G3																PLA2G3															PLA2G3				PLA2G3	PLA2G3
PLA2G4A	ENSG00000116711		PLA2G4A		PLA2G2A									PLA2G4A												PLA2G4A	PLA2G4A	PLA2G4A	PLA2G4A	PLA2G2A		PLA2G4A	PLA2G2A		PLA2G2A	PLA2G4A	PLA2G2A					PLA2G4A			PLA2G2A
PLA2G4B	ENSG00000243708	PLA2G4B	PLA2G4B	PLA2G4B	PLA2G4B	PLA2G4B	PLA2G4B		PLA2G4B	PLA2G4B	PLA2G4B	PLA2G4B	PLA2G4B	PLA2G4B	PLA2G4B	PLA2G4B	PLA2G4B	PLA2G4B			PLA2G4B	PLA2G4B		PLA2G4B	PLA2G4B	PLA2G4B	PLA2G4B	PLA2G4B	PLA2G4B	PLA2G4B		PLA2G4B	PLA2G4B		PLA2G4B	PLA2G4B	PLA2G4B	PLA2G4B		PLA2G4B	PLA2G4B	PLA2G4B	PLA2G4B	PLA2G4B	PLA2G4B	PLA2G4B	PLA2G4B
PLA2G4C	ENSG00000105499	PLA2G4C	PLA2G4C	PLA2G4C	PLA2G4C	PLA2G4C	PLA2G4C	PLA2G4C		PLA2G4C	PLA2G4C	PLA2G4C	PLA2G4C		PLA2G4C	PLA2G4C	PLA2G4C	PLA2G4C	PLA2G4C		PLA2G4C	PLA2G4C	PLA2G4C	PLA2G4C	PLA2G4C	PLA2G4C	PLA2G4C	PLA2G4C	PLA2G4C	PLA2G4C		PLA2G4C	PLA2G4C	PLA2G4C	PLA2G4C	PLA2G4C	PLA2G4C	PLA2G4C	PLA2G4C	PLA2G4C	PLA2G4C	PLA2G4C	PLA2G4C	PLA2G4C	PLA2G4C	PLA2G4C	PLA2G4C	PLA2G4C	PLA2G4C
PLA2G4D	ENSG00000159337									PLA2G4D																	PLA2G4D												PLA2G4D		PLA2G4D	PLA2G4D
PLA2G4E	ENSG00000188089									PLA2G4E															PLA2G4E		PLA2G4E		PLA2G4E				PLA2G4E		PLA2G4E						PLA2G4E	PLA2G4E
PLA2G4F	ENSG00000168907																	PLA2G4F									PLA2G4F		PLA2G4F						PLA2G4F						PLA2G4F	PLA2G4F
PLA2G5	ENSG00000127472	PLA2G5	PLA2G5		PLA2G5		PLA2G5	PLA2G5	PLA2G5	PLA2G5	PLA2G5	PLA2G5	PLA2G5	PLA2G5		PLA2G5	PLA2G5	PLA2G5	PLA2G5		PLA2G5	PLA2G5		PLA2G5	PLA2G5	PLA2G5	PLA2G5	PLA2G5	PLA2G5	PLA2G5		PLA2G5	PLA2G5		PLA2G5	PLA2G5	PLA2G5	PLA2G5		PLA2G5	PLA2G5	PLA2G5		PLA2G5	PLA2G5	PLA2G5	PLA2G5
PLA2G6	ENSG00000184381	PLA2G6	PLA2G6	PLA2G6	PLA2G6	PLA2G6	PLA2G6			PLA2G6	PLA2G6		PLA2G6					PLA2G6	PLA2G6		PLA2G6	PLA2G6	PLA2G6	PLA2G6	PLA2G6	PLA2G6	PLA2G6	PLA2G6	PLA2G6	PLA2G6		PLA2G6	PLA2G6	PLA2G6	PLA2G6	PLA2G6	PLA2G6	PLA2G6	PLA2G6	PLA2G6	PLA2G6	PLA2G6	PLA2G6	PLA2G6	PLA2G6	PLA2G6	PLA2G6
PLA2G7	ENSG00000146070		PLA2G7							PLA2G7	PLA2G7	PLA2G7	PLA2G7	PLA2G7														PLA2G7				PLA2G7	PLA2G7			PLA2G7		PLA2G7			PLA2G7	PLA2G7					PLA2G7
PLAG2D	ENSG00000117215		PLAG2D																					PLAG2D	PLAG2D																			PLAG2D
PLCB1	ENSG00000182621	PLCB1			PLCB1		PLCB1		PLCB1		PLCB1						PLCB1					PLCB1					PLCB1		PLCB1						PLCB1	PLCB1				PLCB1				PLCB1		PLCB1	PLCB1
PLCB2	ENSG00000137841	PLCB2	PLCB2	PLCB2	PLCB2	PLCB2	PLCB2		PLCB2												PLCB2		PLCB2	PLCB2	PLCB2	PLCB2	PLCB2	PLCB2	PLCB2	PLCB2			PLCB2	PLCB2	PLCB2	PLCB2		PLCB2			PLCB2	PLCB2	PLCB2	PLCB2	PLCB2	PLCB2	PLCB2	PLCB2
PLCB3	ENSG00000149782						PLCB3					PLCB3														PLCB3	PLCB3	PLCB3	PLCB3						PLCB3							PLCB3		PLCB3		PLCB3
PLCB4	ENSG00000101333	PLCB4	PLCB4		PLCB4		PLCB4					PLCB4	PLCB4									PLCB4						PLCB4								PLCB4		PLCB4	PLCB4	PLCB4		PLCB4				PLCB4	PLCB4
PLCD1	ENSG00000187091	PLCD1	PLCD1				PLCD1			PLCD1	PLCD1		PLCD1	PLCD1	PLCD1			PLCD1			PLCD1	PLCD1			PLCD1	PLCD1		PLCD1		PLCD1			PLCD1					PLCD1			PLCD1						PLCD1
PLCD3	ENSG00000161714	PLCD3	PLCD3		PLCD3		PLCD3													PLCD3	PLCD3	PLCD3		PLCD3	PLCD3	PLCD3	PLCD3	PLCD3	PLCD3	PLCD3			PLCD3		PLCD3	PLCD3					PLCD3	PLCD3	PLCD3				PLCD3
PLCD4	ENSG00000115556	PLCD4	PLCD4		PLCD4	PLCD4	PLCD4		PLCD4		PLCD4	PLCD4	PLCD4	PLCD4	PLCD4							PLCD4				PLCD4		PLCD4	PLCD4			PLCD4				PLCD4		PLCD4		PLCD4		PLCD4	PLCD4			PLCD4	PLCD4
PLCE1	ENSG00000138193	PLCE1	PLCE1				PLCE1			PLCE1	PLCE1	PLCE1	PLCE1				PLCE1	PLCE1			PLCE1	PLCE1	PLCE1	PLCE1	PLCE1	PLCE1	PLCE1		PLCE1	PLCE1			PLCE1			PLCE1	PLCE1				PLCE1	PLCE1		PLCE1		PLCE1	PLCE1
PLCG1	ENSG00000124181				PLCG1	PLCG1					PLCG1					PLCG1									PLCG1		PLCG1								PLCG1			PLCG1		PLCG1				PLCG1			PLCG1
PLCG2	ENSG00000197943	PLCG2	PLCG2	PLCG2			PLCG2	PLCG2		PLCG2			PLCG2	PLCG2	PLCG2		PLCG2	PLCG2			PLCG2	PLCG2					PLCG2	PLCG2	PLCG2	PLCG2					PLCG2	PLCG2		PLCG2		PLCG2	PLCG2	PLCG2		PLCG2	PLCG2	PLCG2	PLCG2
PLCH1	ENSG00000114805	PLCH1			PLCH1		PLCH1	PLCH1				PLCH1	PLCH1	PLCH1			PLCH1							PLCH1		PLCH1		PLCH1							PLCH1	PLCH1		PLCH1									PLCH1
PLCH2	ENSG00000149527	PLCH2	PLCH2		PLCH2	PLCH2			PLCH2		PLCH2	PLCH2	PLCH2		PLCH2				PLCH2	PLCH2			PLCH2		PLCH2		PLCH2	PLCH2	PLCH2				PLCH2	PLCH2		PLCH2							PLCH2	PLCH2	PLCH2	PLCH2	PLCH2
PLCL1	ENSG00000115896			PLCL1	PLCL1																	PLCL1					PLCL1	PLCL1					PLCL1		PLCL1	PLCL1								PLCL1			PLCL1
PLCL2	ENSG00000154822	PLCL2			PLCL2		PLCL2									PLCL2						PLCL2		PLCL2		PLCL2		PLCL2	PLCL2			PLCL2	PLCL2						PLCL2		PLCL2	PLCL2	PLCL2		PLCL2
PLCZ1	ENSG00000139151																												PLCZ1												PLCZ1	PLCZ1			PLCZ1	PLCZ1
PLD1	ENSG00000075651	PLD1			PLD1	PLD1	PLD1			PLD1		PLD1		PLD1							PLD1	PLD1				PLD1	PLD1	PLD1	PLD1	PLD1			PLD1		PLD1	PLD1		PLD1		PLD1	PLD1	PLD1		PLD1	PLD1	PLD1	PLD1
PLD2	ENSG00000129219	PLD2	PLD2	PLD2	PLD2	PLD2	PLD2	PLD2			PLD2	PLD2									PLD2	PLD2		PLD2	PLD2	PLD2	PLD2	PLD2	PLD2	PLD2			PLD2		PLD2	PLD2		PLD2	PLD2	PLD2	PLD2	PLD2	PLD2	PLD2	PLD2	PLD2	PLD2
PTPN22	ENSG00000134242						PTPN22				PTPN22	PTPN22									PTPN22				PTPN22		PTPN22									PTPN22		PTPN22			PTPN22	PTPN22	PTPN22		PTPN22
TRPA1	ENSG00000104321																									TRPA1																				TRPA1
TRPV1	ENSG00000196689	TRPV1		TRPV1	TRPV1		TRPV1			TRPV1	TRPV1	TRPV1					TRPV1				TRPV1	TRPV1	TRPV1		TRPV1	TRPV1	TRPV1	TRPV1	TRPV1	TRPV1			TRPV1	TRPV1		TRPV1	TRPV1	TRPV1	TRPV1	TRPV1	TRPV1	TRPV1	TRPV1	TRPV1	TRPV1		TRPV1		TRPV1
[truncated: 1 more columns]
